# Supplementary material for: Use of Slaughterhouses as Sentinel Points for Genomic Surveillance of Foot-and-Mouth Disease Virus in Southern Vietnam
Source: MDPI journal article supplement (doi:10.3390/v13112203), 2021-11-02
Supplement: s1 [file s1]

**Table S1: Serology and OPF screening from farms in each province in 2015**

| Province   | Serum Tested | Serum positive | Seropositive percentage of samples | OPF Screened (rRT-PCR) | OPF positive for FMDV RNA | Percentage OPF positive |
|------------|--------------|----------------|------------------------------------|------------------------|---------------------------|-------------------------|
| Hà Tĩnh    | 500          | 86             | 17.2 (13,21)                       | 112                    | 0                         | 0                       |
| Lạng Sơn   | 484          | 20             | 4 (2,5)                            | 33                     | 0                         | 0                       |
| Phú Thọ    | 500          | 50             | 10 (7,12)                          | 62                     | 0                         | 0                       |
| Bắc Kạn    | <i>na</i>    | <i>na</i>      | <i>na</i>                          | <i>na</i>              | <i>na</i>                 | <i>na</i>               |
| Ninh Thuận | <i>na</i>    | <i>na</i>      | <i>na</i>                          | <i>na</i>              | <i>na</i>                 | <i>na</i>               |
| Đồng Tháp  | 485          | 149            | 31 (26,34)                         | 139                    | 36                        | 25.8                    |
| Bình Phước | 514          | 84             | 16 (13,19)                         | 80                     | 2                         | 2.5                     |
| Đắk Lắk    | 504          | 142            | 28 (24,32)                         | 142                    | 3                         | 2.1                     |
| TOTAL      | 2,987        | 531            |                                    | 568                    | 41                        | 7.2                     |

**Table S2: Serology and OPF screening from farms in each province in 2016**

| Province   | Serum Tested | Serum positive | Seropositive percentage of samples | OPF Screened (rRT-PCR) | OPF positive | Percentage OPF positive |
|------------|--------------|----------------|------------------------------------|------------------------|--------------|-------------------------|
| Hà Tĩnh    | <i>na</i>    | <i>na</i>      | <i>na</i>                          | <i>na</i>              | <i>na</i>    | <i>na</i>               |
| Lạng Sơn   | 236          | 31             | 13 (8,17)                          | 33                     | 2            | 6                       |
| Phú Thọ    | 253          | 34             | 13 (9,17)                          | 32                     | 2            | 6.2                     |
| Bắc Kạn    | 496          | 167            | 34 (29,37)                         | 165                    | 32           | 19.4                    |
| Ninh Thuận | 250          | 177            | 71 (65,76)                         | 177                    | 20           | 11.2                    |
| Đồng Tháp  | 254          | 100            | 39 (33,45)                         | 102                    | 33           | 32.3                    |
| Bình Phước | <i>na</i>    | <i>na</i>      | <i>na</i>                          | <i>na</i>              | <i>na</i>    | <i>na</i>               |
| Đắk Lắk    | <i>na</i>    | <i>na</i>      | <i>na</i>                          | <i>na</i>              | <i>na</i>    | <i>na</i>               |
| TOTAL      | 1,489        | 509            |                                    | 509                    | 89           | 17.4                    |

**Table S3: Serology and OPF screening from farms in each province in 2017**

| Province   | Serum Tested | Serum positive | Seropositive percentage of samples | OPF Screened (rRT-PCR) | OPF positive for FMDV RNA | Percentage OPF positive |
|------------|--------------|----------------|------------------------------------|------------------------|---------------------------|-------------------------|
| Hà Tĩnh    | <i>na</i>    | <i>na</i>      | <i>na</i>                          | <i>na</i>              | <i>na</i>                 | <i>na</i>               |
| Lạng Sơn   | 316          | 92             | 29 (24,34)                         | 92                     | 0                         | 0                       |
| Phú Thọ    | 177          | 82             | 46 (39,53)                         | 77                     | 0                         | 0                       |
| Bắc Kạn    | 982          | 447            | 46 (42,48)                         | 443                    | 33                        | 7.4                     |
| Ninh Thuận | 585          | 467            | 80 (76,83)                         | 461                    | 49                        | 10.6                    |
| Đồng Tháp  | 369          | 210            | 57 (51,61)                         | 212                    | 85                        | 40                      |
| Bình Phước | <i>na</i>    | <i>na</i>      | <i>na</i>                          | <i>na</i>              | <i>na</i>                 | <i>na</i>               |
| Đắk Lắk    | 252          | 182            | 72 (66,77)                         | 181                    | 56                        | 31                      |
| TOTAL      | 2,681        | 1,480          |                                    | 1,466                  | 223                       |                         |

**Table S4: Serology and OPF screening from farms in each province in 2018**

| Province   | Serum Tested | Serum positive | Seropositive percentage of samples | OPF Screened (rRT-PCR) | OPF positive for FMDV RNA | Percentage OPF positive |
|------------|--------------|----------------|------------------------------------|------------------------|---------------------------|-------------------------|
| Hà Tĩnh    | <i>na</i>    | <i>na</i>      | <i>na</i>                          | <i>na</i>              | <i>na</i>                 | <i>na</i>               |
| Lạng Sơn   | 351          | 65             | 19 (14,22)                         | 65                     | 1                         | 1.53                    |
| Phú Thọ    | 149          | 48             | 32 (24,39)                         | 48                     | 0                         | 0                       |
| Bắc Kạn    | 752          | 363            | 48 (44,51)                         | 347                    | 3                         | 0.8                     |
| Ninh Thuận | 319          | 257            | 81 (76,84)                         | 256                    | 3                         | 1.1                     |
| Đồng Tháp  | 540          | 284            | 53 (48,56)                         | 284                    | 31                        | 11                      |
| Bình Phước | <i>na</i>    | <i>na</i>      | <i>na</i>                          | <i>na</i>              | <i>na</i>                 | <i>na</i>               |
| Đắk Lắk    | 942          | 605            | 64 (61,67)                         | 605                    | 27                        | 4.4                     |
| TOTAL      | 3,053        | 1,622          |                                    | 1,605                  | 65                        |                         |

**Table S5: Serology and OPF screening from farms in each province in 2019**

| Province   | Serum Tested | Serum positive | Seropositive percentage of samples | OPF Screened (rRT-PCR) | OPF positive for FMDV RNA | Percentage OPF positive |
|------------|--------------|----------------|------------------------------------|------------------------|---------------------------|-------------------------|
| Hà Tĩnh    | <i>na</i>    | <i>na</i>      | <i>na</i>                          | <i>na</i>              | <i>na</i>                 | <i>na</i>               |
| Lạng Sơn   | <i>na</i>    | <i>na</i>      | <i>na</i>                          | <i>na</i>              | <i>na</i>                 | <i>na</i>               |
| Phú Thọ    | 117          | 55             | 47 (38,56)                         | 55                     | 0                         | 0                       |
| Bắc Kạn    | 560          | 287            | 51 (47,55)                         | 286                    | 5                         | 1.74                    |
| Ninh Thuận | 136          | 109            | 80 (73,86)                         | 109                    | 0                         | 0                       |
| Đồng Tháp  | 317          | 145            | 46 (40,51)                         | 145                    | 12                        | 8.27                    |
| Bình Phước | <i>na</i>    | <i>na</i>      | <i>na</i>                          | <i>na</i>              | <i>na</i>                 | <i>na</i>               |
| Đắk Lắk    | 475          | 304            | 64 (59,68)                         | 302                    | 11                        | 3.64                    |
| TOTAL      | 1,605        | 900            |                                    | 897                    | 28                        |                         |

**Table S6: Slaughterhouse Serology and OPF sample collection summary Long An**

| Sampling Round | Serum Tested | Number of positive 3ABC | Percentage 3ABC ELISA positive | OPF Screened (rRT-PCR) | OPF positive for FMDV RNA | Percentage OPF positive |
|----------------|--------------|-------------------------|--------------------------------|------------------------|---------------------------|-------------------------|
| 1              | 30           | 21                      | 70.0 (56,86)                   | 30                     | 7                         | 23.3                    |
| 2              | 30           | 10                      | 33.3 (16.5, 50)                | 30                     | 2                         | 6.6                     |
| 3              | 28           | 4                       | 14.3 (1.3,27)                  | 28                     | 0                         | 0                       |
| 4              | 30           | 11                      | 36.7 (19,53)                   | 30                     | 1                         | 3.3                     |
| 5              | 32           | 15                      | 46.9 (29,64)                   | 32                     | 4                         | 12.5                    |
| 6              | 30           | 10                      | 33.3 (16.5,50)                 | 30                     | 4                         | 13.3                    |
| 7              | 30           | 7                       | 23.3 (8.2, 38)                 | 30                     | 4                         | 13.3                    |
| 8              | 30           | 11                      | 36.7 (19.5,53)                 | 30                     | 3                         | 10                      |
| 9              | 30           | 10                      | 33.3 (16.5, 50)                | 30                     | 4                         | 13.3                    |
| 10             | 24           | 13                      | 54.2 (34.3, 74)                | 24                     | 5                         | 20.8                    |
| 11             | 36           | 17                      | 47.2 (31,63)                   | 36                     | 6                         | 16.6                    |
| 12             | 23           | 9                       | 39.1 (19.2,56)                 | 23                     | 0                         | 0                       |
| 13             | 37           | 11                      | 29.7 (15,44)                   | 37                     | 3                         | 8.1                     |
| 14             | 30           | 9                       | 30.0 (13.6,46)                 | 30                     | 1                         | 3.3                     |
| 15             | 20           | 11                      | 55.0 (33,76 )                  | 20                     | 4                         | 20                      |
| 16             | 40           | 10                      | 25.0 (11,38)                   | 40                     | 3                         | 7.5                     |
| Grand Total    | 480          | 179                     | 37.3                           | 480                    | 51                        |                         |

**Table S7: Slaughterhouse Serology and OPF sample collection summary Tay Ninh**

| Sampling Round | Serum Tested | Number of positive 3ABC | Percentage 3ABC ELISA positive | OPF Screened (rRT-PCR) | OPF positive for FMDV RNA | Percentage OPF positive |
|----------------|--------------|-------------------------|--------------------------------|------------------------|---------------------------|-------------------------|
| 1              | 30           | 28                      | 93.3 (84, 100)                 | 30                     | 9                         | 30                      |
| 2              | 30           | 14                      | 46.7 (29,64)                   | 30                     | 6                         | 20                      |
| 3              | 30           | 21                      | 70.0 (53,86)                   | 30                     | 7                         | 23.3                    |
| 4              | 30           | 10                      | 33.3 (16.5,50)                 | 30                     | 5                         | 16.6                    |
| 5              | 30           | 14                      | 46.7 (29,64)                   | 30                     | 7                         | 23.3                    |
| 6              | 30           | 7                       | 23.3 (8,38)                    | 30                     | 1                         | 3.3                     |
| 7              | 30           | 18                      | 60.0 (42,77)                   | 30                     | 5                         | 16.6                    |
| 8              | 30           | 21                      | 70.0 (53,86)                   | 30                     | 4                         | 13.3                    |
| 9              | 30           | 8                       | 26.7 (11,42)                   | 30                     | 5                         | 16.6                    |
| 10             | 30           | 9                       | 30.0 (13,46)                   | 30                     | 1                         | 3.3                     |
| 11             | 30           | 17                      | 56.7 (39,74)                   | 30                     | 7                         | 23.3                    |
| 12             | 30           | 15                      | 50.0 (32,74)                   | 30                     | 2                         | 6.6                     |
| 13             | 30           | 11                      | 36.7 (19.5, 53.8)              | 30                     | 2                         | 6.6                     |
| 14             | 30           | 20                      | 66.7 (49.8,83)                 | 30                     | 4                         | 13.3                    |
| 15             | 30           | 13                      | 43.3 (25.6, 70)                | 30                     | 2                         | 6.6                     |
| 16             | 30           | 23                      | 76.7 (61,91)                   | 30                     | 4                         | 13.3                    |
| Grand Total    | 480          | 277                     | 57.7                           | 480                    | 71                        |                         |

**Table S8: Large cluster information of serotype O**

| Name                   | Type                    | Area    | Dates detected            | Species                    | MRCA                       | Number of sequences | Closest lineage  | Within cluster GD |
|------------------------|-------------------------|---------|---------------------------|----------------------------|----------------------------|---------------------|------------------|-------------------|
| Cluster 1              | Farm and Outbreak       | North   | 2010-12-22 to 2014-07-14  | Pig, Cattle, Buffalo       | 2008.6<br>(1998.7,2020)    | 54                  | O/ME-SA/Pan Asia | 0.028             |
|                        | Farm and Outbreak       | Central | 2010-12-26 to 2012-05-23  | Pig, Buffalo               |                            |                     |                  |                   |
|                        | Farm and Outbreak       | South   | 2010-12-21 to 2017-01-09* | Pig, Cattle, Buffalo       |                            |                     |                  |                   |
| Cluster 2 <sup>†</sup> | Farm and Outbreak       | North   | 2017-10-01 to 2018-11-11  | Pig, Cattle, Buffalo, Goat | 2015.9<br>(2013.4,2019.6)  | 90                  | O/ME-SA/Pan Asia | 0.011             |
|                        | Outbreak                | Central | 2018-04-13                | Cattle                     |                            |                     |                  |                   |
|                        | Farm and Slaughterhouse | South   | 2017-01-10 to 2018-07-01  | Cattle, Buffalo            |                            |                     |                  |                   |
| Cluster 6 <sup>†</sup> | Outbreak                | North   | 2018-11-13 to 2019-01-15  | Pig                        | 2017.9<br>(2017.5, 2019.1) | 21                  | Mya-98           | 0.021             |
|                        | Outbreak                | Central | 2018-12-27 to 2019-01-05  |                            |                            |                     |                  |                   |
|                        | Outbreak                | South   | 2018-11-13 to             |                            |                            |                     |                  |                   |
| Cluster 8              | Outbreak                | North   | 2015-10-30 to 2017-09-23* | Pig, Cattle                | 2011.7                     | 12                  | O/ME-SA/Ind2001d | 0.021             |
|                        |                         | South   | 2015-09-04 to 2015-10-22  | Pig, Cattle, Buffalo       | (2006.6,2020.9)            |                     |                  |                   |
| Cluster 9 <sup>†</sup> | Outbreak                | North   | 2016-01-16 to 2016-11-18  | Cattle                     | 2013.1<br>(2007.2,2019.2)  | 13                  | Mya-98 B         | 0.066             |
|                        | Outbreak                | Central | 2013-10-07 to 2016-10-14  | Pig (2016-11-18)           |                            |                     |                  |                   |
|                        | Farm and Slaughterhouse | South   | 2016-08-18 to 2017-12-15  |                            |                            |                     |                  |                   |

|                         |                                         |       |                             |                            |                            |    |                     |       |
|-------------------------|-----------------------------------------|-------|-----------------------------|----------------------------|----------------------------|----|---------------------|-------|
| Cluster 10 <sup>†</sup> | Outbreak                                | North | 2016-11-16                  | Cattle<br>Pig (2015-09-10) | 20 09.7<br>(2002.9,2018.8) | 22 | O/ME-SA/Pan<br>Asia | 0.027 |
|                         | Farm, Outbreak<br>and<br>Slaughterhouse | South | 2013-05-17 to<br>2017-08-01 |                            |                            |    |                     |       |

<sup>†</sup> Clusters that were circulating in southern Vietnam during period of slaughterhouse sampling

\* 2017 sequence does not cluster with other sequences in cluster 1 and 8, thus this clusters were not considered to be circulating after 2012 and 2015.

**Table S9: Large cluster information for serotype A**

| Name                   | Type                        | Area    | Dates detected              | Species                    | MRCA                       | Number of sequences | Closest lineage | Within cluster GD |
|------------------------|-----------------------------|---------|-----------------------------|----------------------------|----------------------------|---------------------|-----------------|-------------------|
| cluster9               | Farm                        | North   | 2017-08-25 to<br>2018-01-08 | Cattle                     | 2015.3<br>(2012.2, 2019.5) | 56                  | Sea/97          | 0.01              |
|                        | Farm and outbreak           | Central | 2017-01-08 to<br>2019-01-05 |                            |                            |                     |                 |                   |
| cluster5 <sup>†</sup>  | Outbreak                    | North   | 2017-08-29 to<br>2017-09-11 | Cattle                     | 2015.8<br>(2013.1,2019.5)  | 20                  | Sea/97          | 0.01              |
|                        | Farm and outbreak           | Central | 2017-01-08 to<br>2017-08-05 |                            |                            |                     |                 |                   |
|                        | Slaughterhouse              | South   | 2017-10-17 to<br>2018-03-29 |                            |                            |                     |                 |                   |
| cluster4 <sup>†</sup>  | Outbreak                    | North   | 2013-12-01 to<br>2014-04-24 | Cattle<br>Pig (2014-04-24) | 2012.4<br>(2006.4,2019.4)  | 21                  | Sea/97          | 0.02              |
|                        | Outbreak                    | Central | 2013-10-09 to<br>2016-10-13 | Cattle<br>Pig (2015-09-10) |                            |                     |                 |                   |
|                        | Outbreak and Slaughterhouse | South   | 2017-10-31 to<br>2019-06-01 | Buffalo                    |                            |                     |                 |                   |
| cluster10 <sup>†</sup> | Farm                        | South   | 2017-01-06 to<br>2019-06-01 | Cattle                     | 2016.8<br>(2015.5,2020.1)  | 12                  | Sea/97          | 0.04              |
|                        | Slaughterhouse              |         | 2018-01-24 to<br>2019-02-27 |                            |                            |                     |                 |                   |

<sup>†</sup> Clusters that were circulating in southern Vietnam during period of slaughterhouse sampling

**Table S10: Model selection results from the Bayesian Evolutionary Sampling Tree (BEAST) where the best model, relaxed clock coalescent sky grid model was selected.**

| Serotype O                        |               |                       |                        |                                |
|-----------------------------------|---------------|-----------------------|------------------------|--------------------------------|
|                                   | Path sampling | Path Sampling average | Steppingstone sampling | Steppingstone sampling average |
| Relaxed clock exponential         | -8507.962087  | -8507.037632          | -8510.304413           | -8509.431206                   |
|                                   | -8506.113178  |                       | -8508.558              |                                |
| Relaxed clock expansion           | -8508.172778  | -8508.342028          | -8508.451305           | -8508.291626                   |
|                                   | -8508.511278  |                       | -8508.131947           |                                |
| Relaxed clock constant            | -8458.92312   | -8458.449227          | -8459.655856           | -8459.274212                   |
|                                   | -8457.975333  |                       | -8458.892568           |                                |
| Relaxed clock coalescent sky grid | -8137.909934  | -8138.998022          | -8138.659178           | -8139.871078                   |
|                                   | -8140.086109  |                       | -8141.082978           |                                |
| Serotype A                        |               |                       |                        |                                |
|                                   | Path sampling | Path Sampling average | Steppingstone sampling | Steppingstone sampling average |
| Relaxed clock exponential         | -5696.304571  | -5695.588948          | -5696.86083            | -5696.043596                   |
|                                   | -5694.873326  |                       | -5695.226363           |                                |
| Relaxed clock expansion           | -5697.271664  | -5698.113582          | -5698.07718            | -5698.947185                   |
|                                   | -5698.955501  |                       | -5699.817189           |                                |
| Relaxed clock constant            | -5706.882944  | -5693.61778           | -5706.951335           | -5706.906472                   |
|                                   | -5680.352616  |                       | -5706.86161            |                                |
| Relaxed clock coalescent sky grid | -5686.396487  | -5683.374551          | -5688.637852           | -5685.418112                   |
|                                   | -5680.352616  |                       | -5682.198372           |                                |



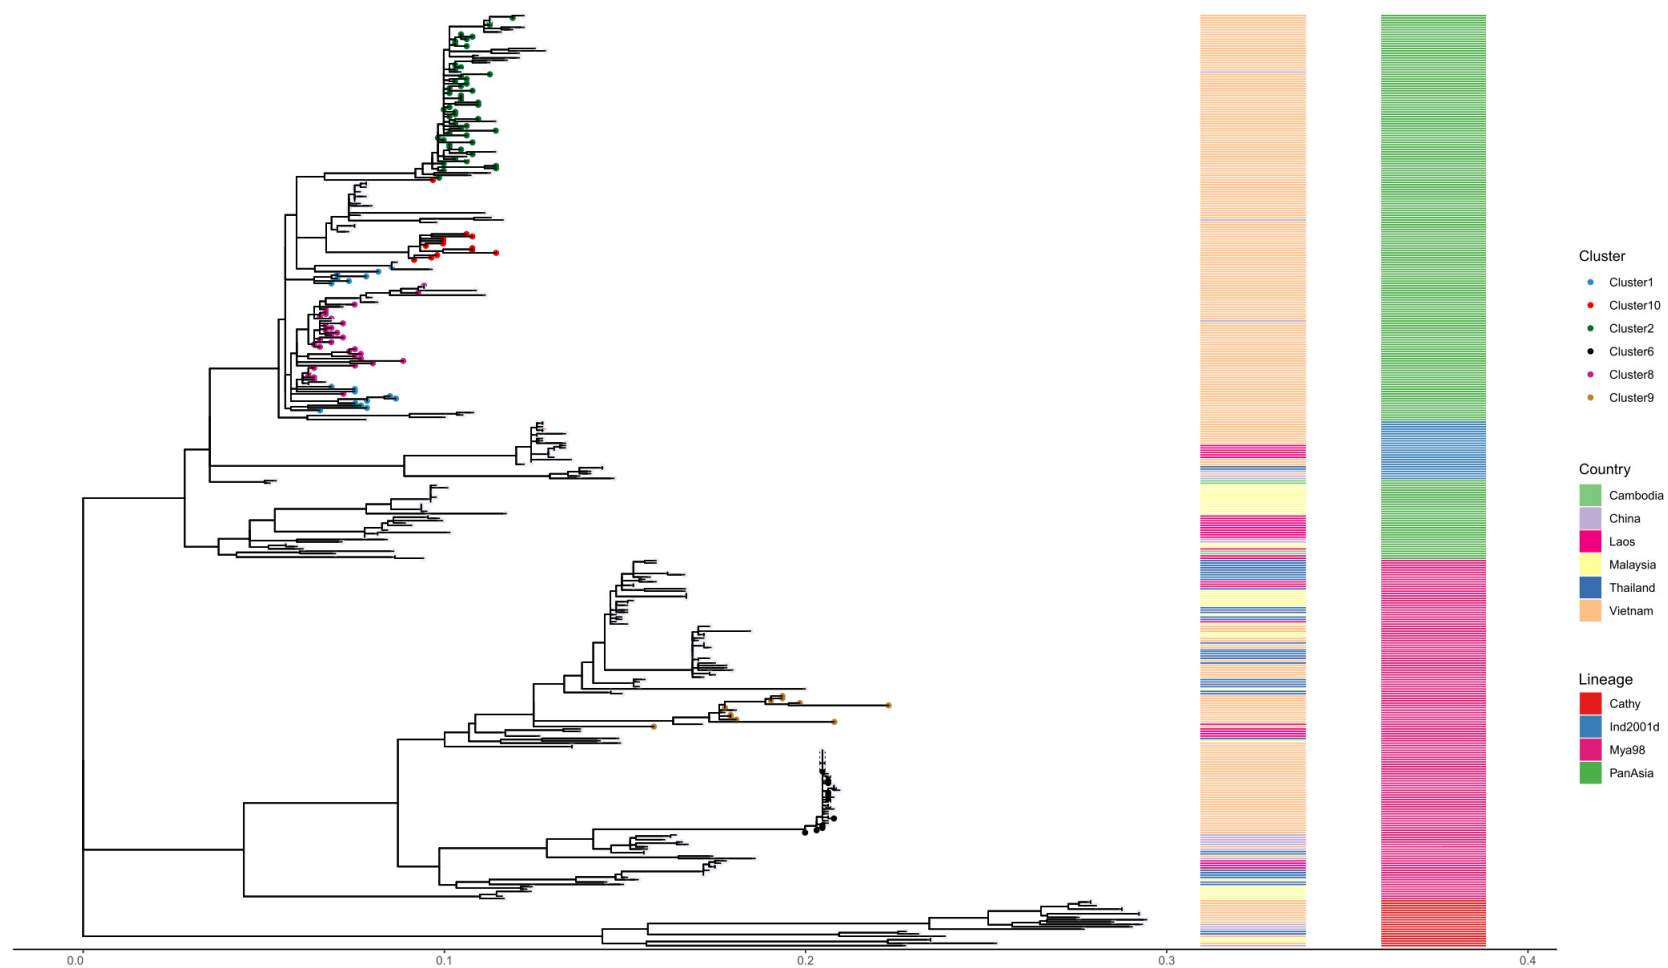

[Figure S1: Serotype O clusters shown in a maximum likelihood tree with other circulating FMD sequences obtained from South East Asian countries Cambodia, Laos, Malaysia, Thailand. Different node colors show the different clusters, only clusters with <10 sequences are labelled. Different bars show different lineages and the country where FMD sequence was isolated. ]

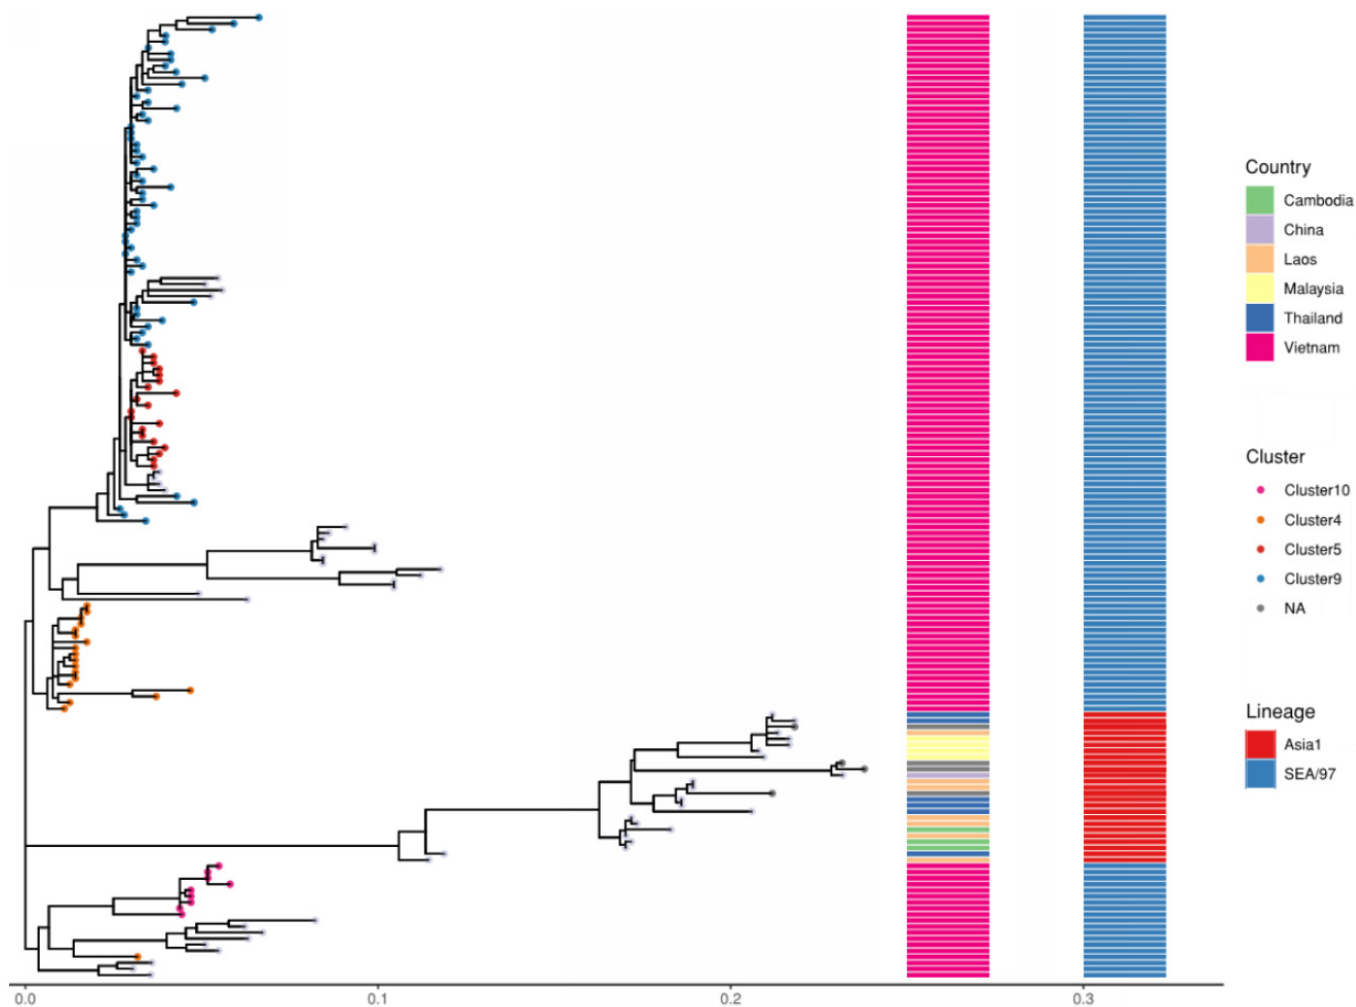

[Figure S2: Serotype A clusters shown in a maximum likelihood tree with other circulating FMD sequences obtained from South East Asian countries Cambodia, Laos, Malaysia, Thailand. Different node colors show the different clusters, only clusters with <10 sequences are labelled. Different bars show different lineages and the country where FMD sequence was isolated.]
